# Supplementary material for: Mycotoxin Zearalenone Attenuates Innate Immune Responses and Suppresses NLRP3 Inflammasome Activation in LPS-Activated Macrophages
Source: MDPI journal article supplement (doi:10.3390/toxins13090593), 2021-08-25
Supplement: s1 [file s1]

# Supplementary Materials: Mycotoxin Zearalenone Attenuates Innate Immune Responses and Suppresses NLRP3 Inflammasome Activation in LPS-Activated Macrophages

Po-Yen Lee, Ching-Chih Liu, Shu-Chi Wang, Kai-Yin Chen, Tzu-Chieh Lin, Po-Len Liu, Chien-Chih Chiu, I-Chen Chen, Yu-Hung Lai, Wei-Chung Cheng, Wei-Ju Chung, Hsin-Chih Yeh, Chi-Han Huang, Chia-Cheng Su, Shu-Pin Huang and Chia-Yang Li

Table S1. List of primary antibodies used in this study.

| Antibodies                   | Catalog Number | Company                                   |
|------------------------------|----------------|-------------------------------------------|
| Nitric oxide synthase (iNOS) | SC-651         | Santa Cruz Biotechnology (Santa Cruz, CA) |
| Cyclooxygenase 2 (COX-2)     | SC-166475      | Santa Cruz Biotechnology                  |
| Phospho-ERK1/2               | CST#4370       | Cell Signaling (Farmingdale, NY)          |
| ERK1/2                       | CST#4695       | Cell Signaling                            |
| Phospho-JNK 1/2              | CST#4668       | Cell Signaling                            |
| JNK 1/2                      | CST#9258       | Cell Signaling                            |
| Phospho-p38 MAPK             | CST#4511       | Cell Signaling                            |
| p38 MAPK                     | CST#8690       | Cell Signaling                            |
| Cleaved caspase-1            | CST#4199       | Cell Signaling                            |
| Caspase-1 p10                | SC-514         | Santa Cruz Biotechnology                  |
| Cleaved IL-1 $\beta$         | CST#52718      | Cell Signaling                            |
| IL-1 $\beta$                 | SC-7884        | Santa Cruz Biotechnology                  |
| ASC                          | CST#13833      | Cell Signaling                            |
| NLRP3                        | TA336883       | OriGene (Rockville, MD)                   |
| $\beta$ -actin               | MA5-15739      | Invitrogen (Carlsbad, CA)                 |
